# Supplementary material for: Microscale spatial analysis provides evidence for adhesive monopolization of dietary nutrients by specific intestinal bacteria
Source: PLOS journal article supplement (doi:10.1371/journal.pone.0175497), 2017-04-10
Supplement: S1 (10.1371/journal.pone.0175497.s001) [file redirect.do]

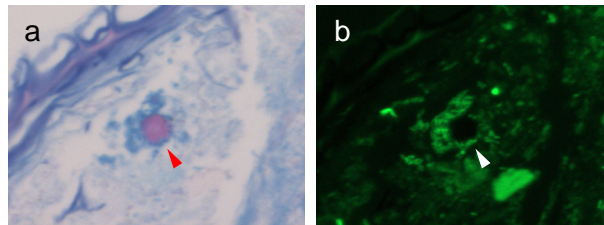

S1 Fig

PAS-positive, Alcian blue-negative granule with bacteria

A cross section of murine jejunum was stained by (a) Periodic acid-Schiff (PAS) and Alcian blue, and subsequently (b) stained by FISH (Eub338; green).
